# Supplementary material
Source: PubMed Central journal article supplement (PMC8277103)

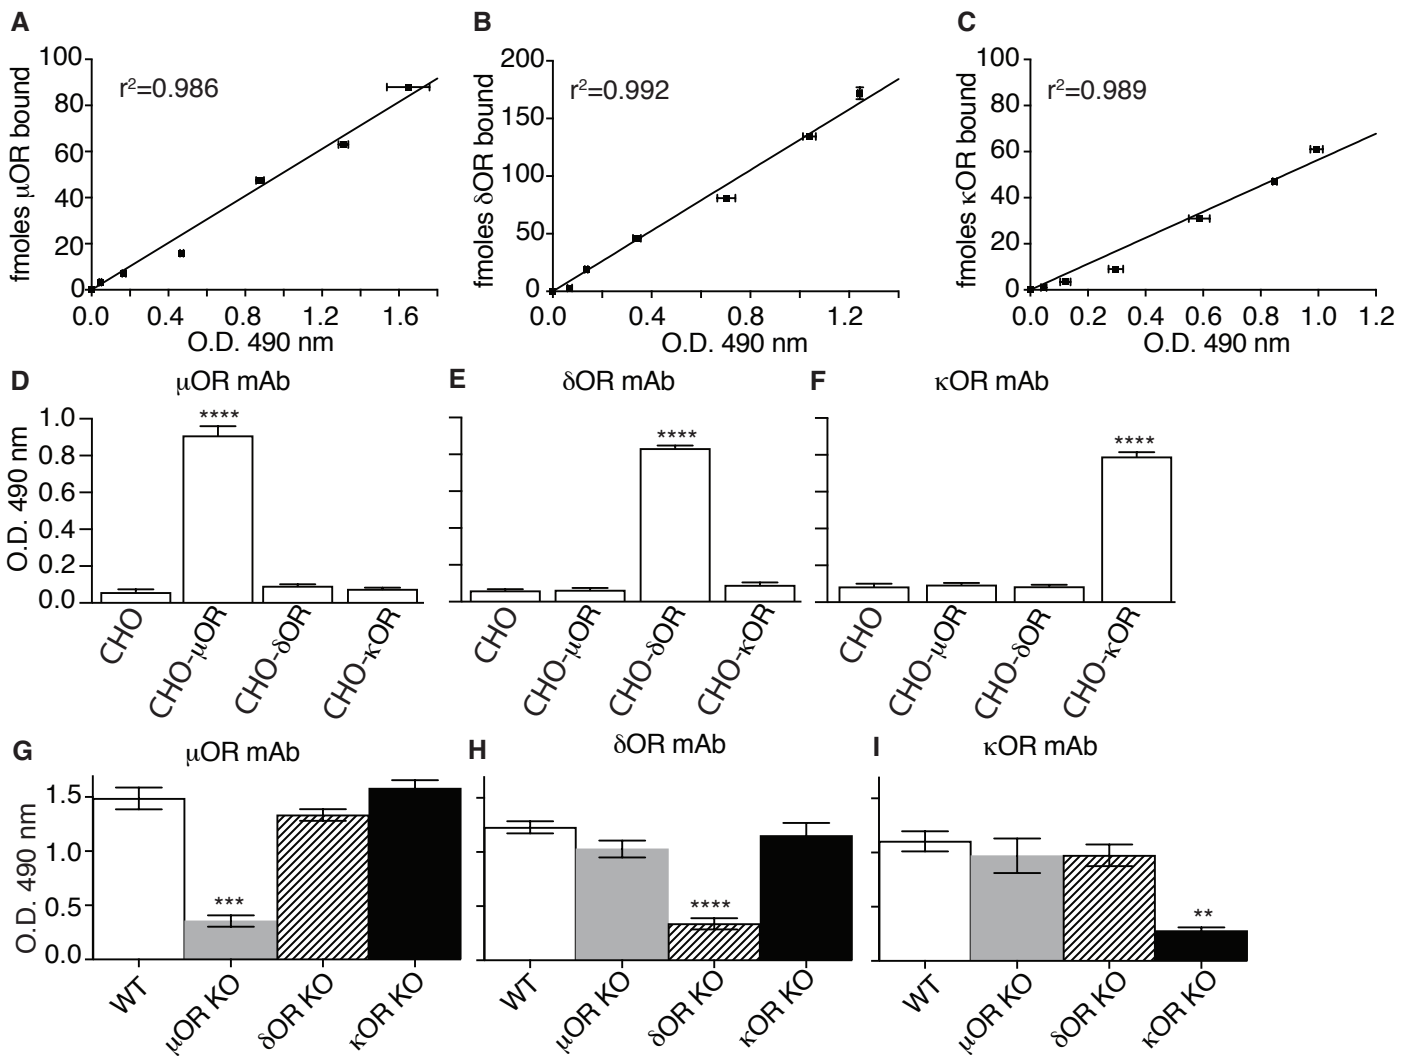

Supl. Fig 1

Supplement: NIHMS1659492-supplement-10571_2020_1015_MOESM1_ESM.pdf [file NIHMS1659492-supplement-10571_2020_1015_MOESM1_ESM.pdf]

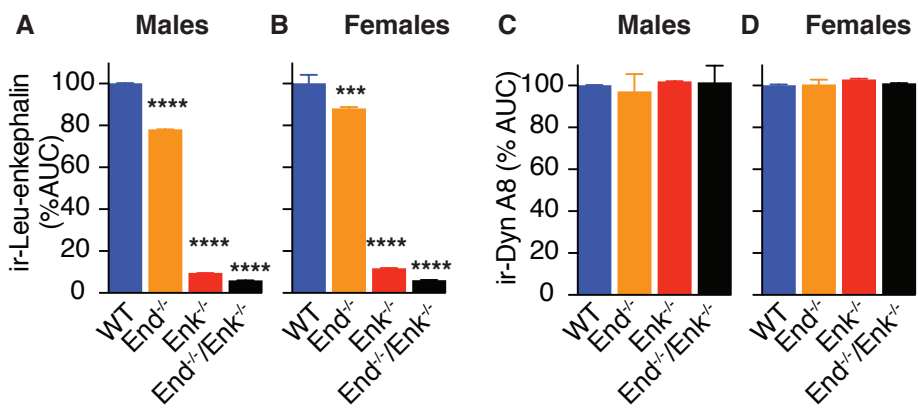

Supl. Fig 2

Supplement: NIHMS1659492-supplement-10571_2020_1015_MOESM2_ESM.pdf [file NIHMS1659492-supplement-10571_2020_1015_MOESM2_ESM.pdf]
